# Supplementary material
Source: publisher figshare collection journal article supplement (https://tandf.figshare.com/ndownloader/files/12476114)
Supplement: Supplementary file 1 [file 12476114]

**Supplementary figures**

**
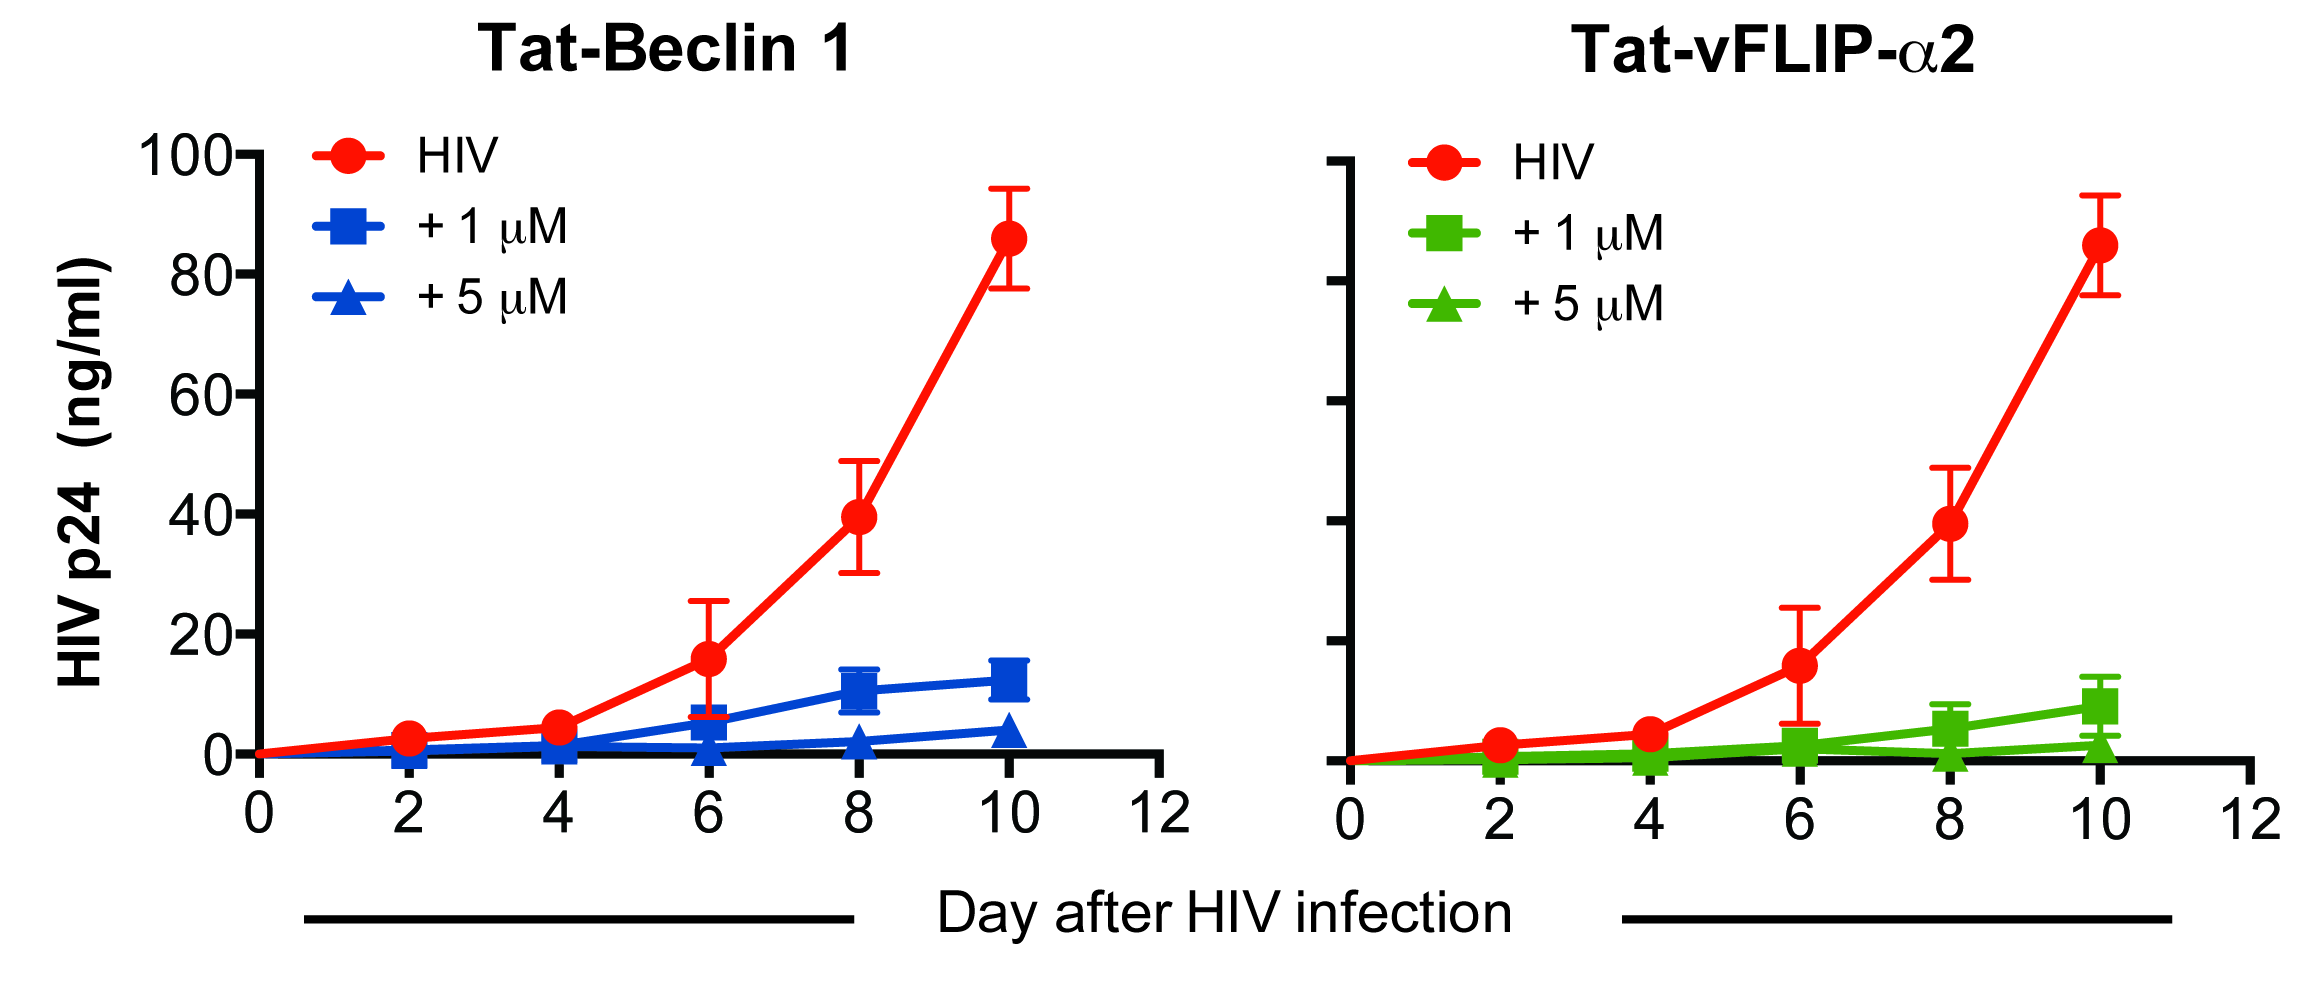
**

**Figure S1.** Pretreatment with autophagy-inducing peptides inhibits HIV replication in human macrophages.Human macrophages were pretreated with Tat-Beclin 1 or Tat-vFLIP-α2 for 4 h and then infected with HIV at 0.1 M.O.I. for an additional 4 h. After washing extensively with PBS, macrophages were cultured with fresh medium maintained with Tat-Beclin 1 or Tat-vFLIP-α2 for another 10 days. At day 2, 4, 6 and 8 p.i., Tat-Beclin 1 and Tat-vFLIP-α2 was reintroduced into the cell culture medium to maintain the effective concentration. The collected cell culture supernatants were tested for HIV p24 antigen release by ELISA. Data are derived from 4 different donors and reported as means ± s.e.m.


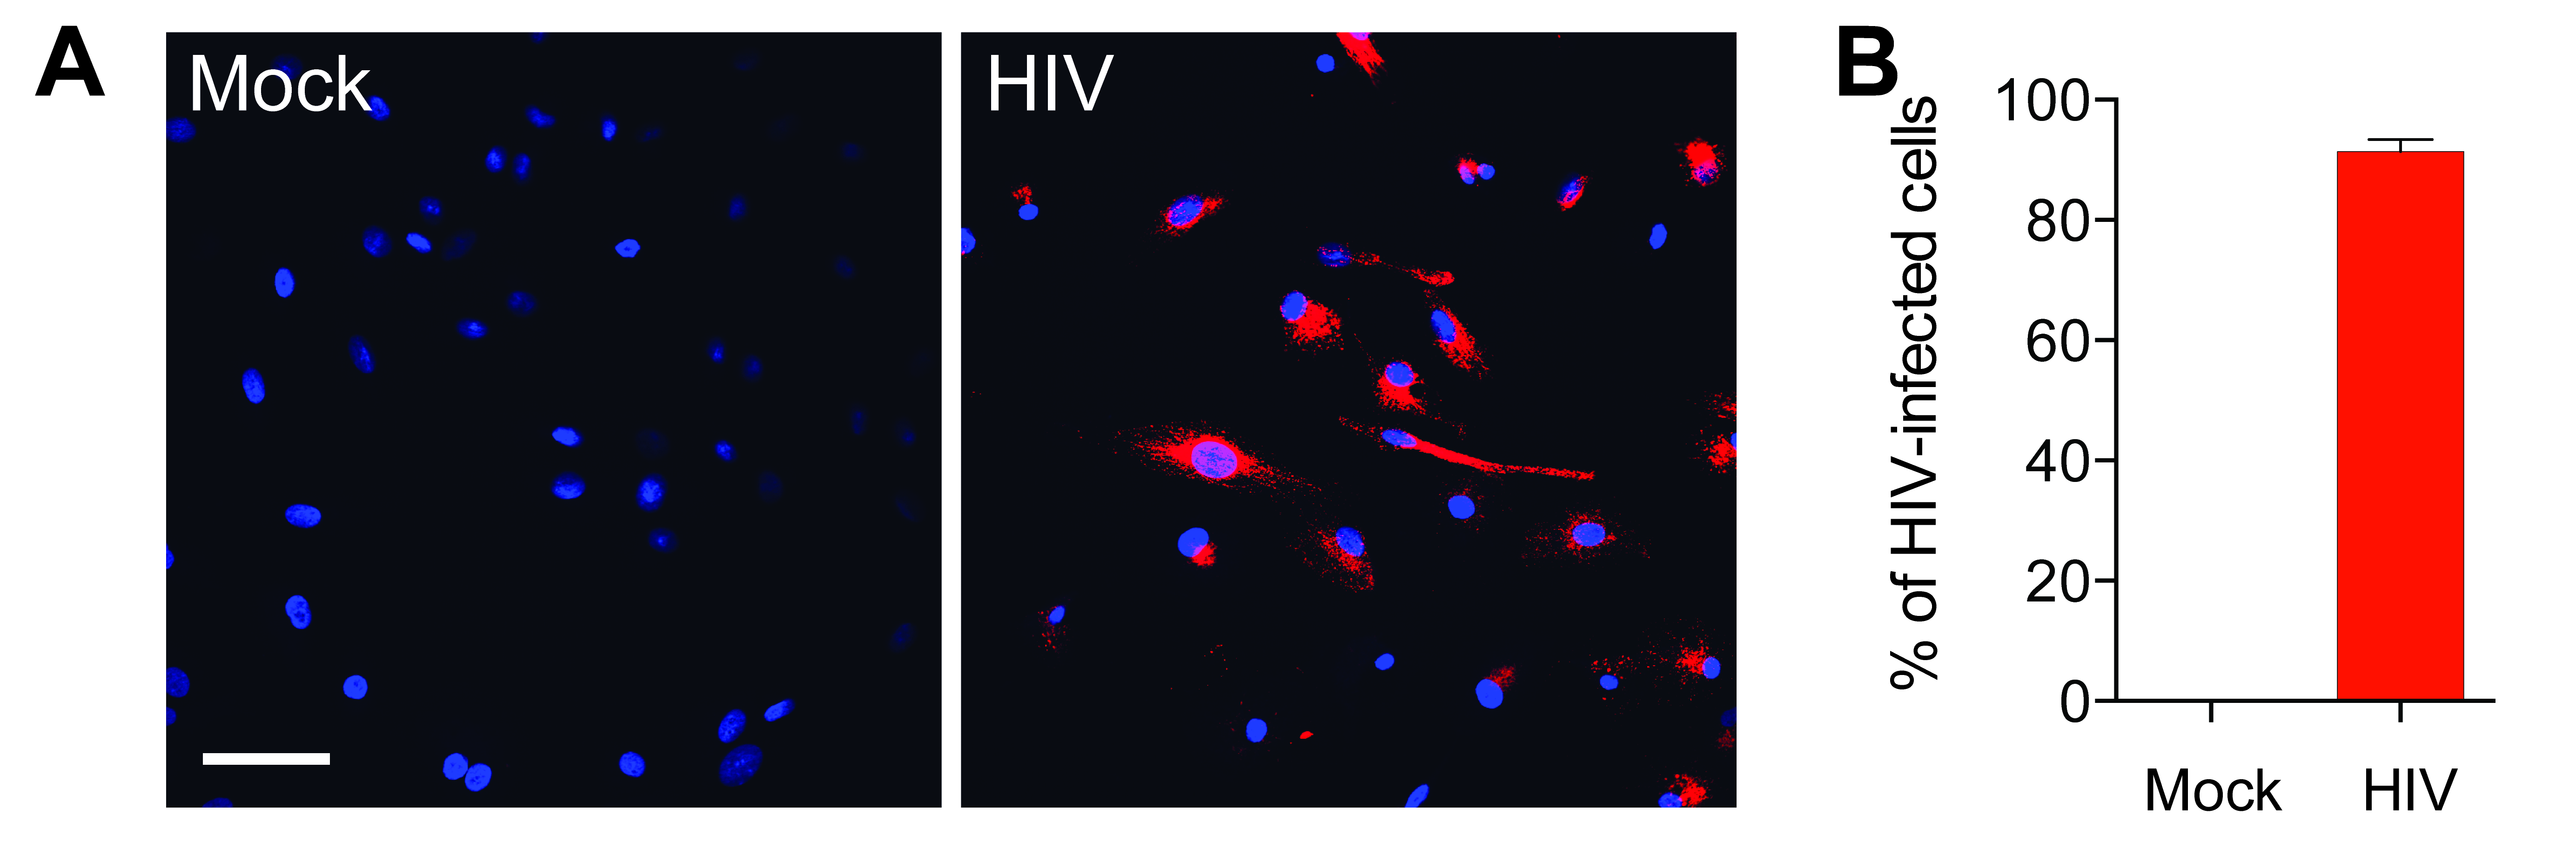


**Figure S2.** The infection rate of chronically HIV-infected macrophages. (**A**) At day 10 p.i., chronically HIV-infected macrophages were fixed with 4% paraformaldehyde solution in PBS and analyzed by immunofluorescence staining for HIV p24. The representative imagines were captured using confocal microscopy. The red color represents HIV p24. The blue color represents nuclei staining with DAPI. Scale bar: 50 µm. (**B**) The percent infected cells was determined by dividing the total number of cells positive for HIV p24 by the total number of DAPI-positive cells after counting 10 fields for each donor. Data are derived from 4 different donors and shown as means ± s.e.m.

**
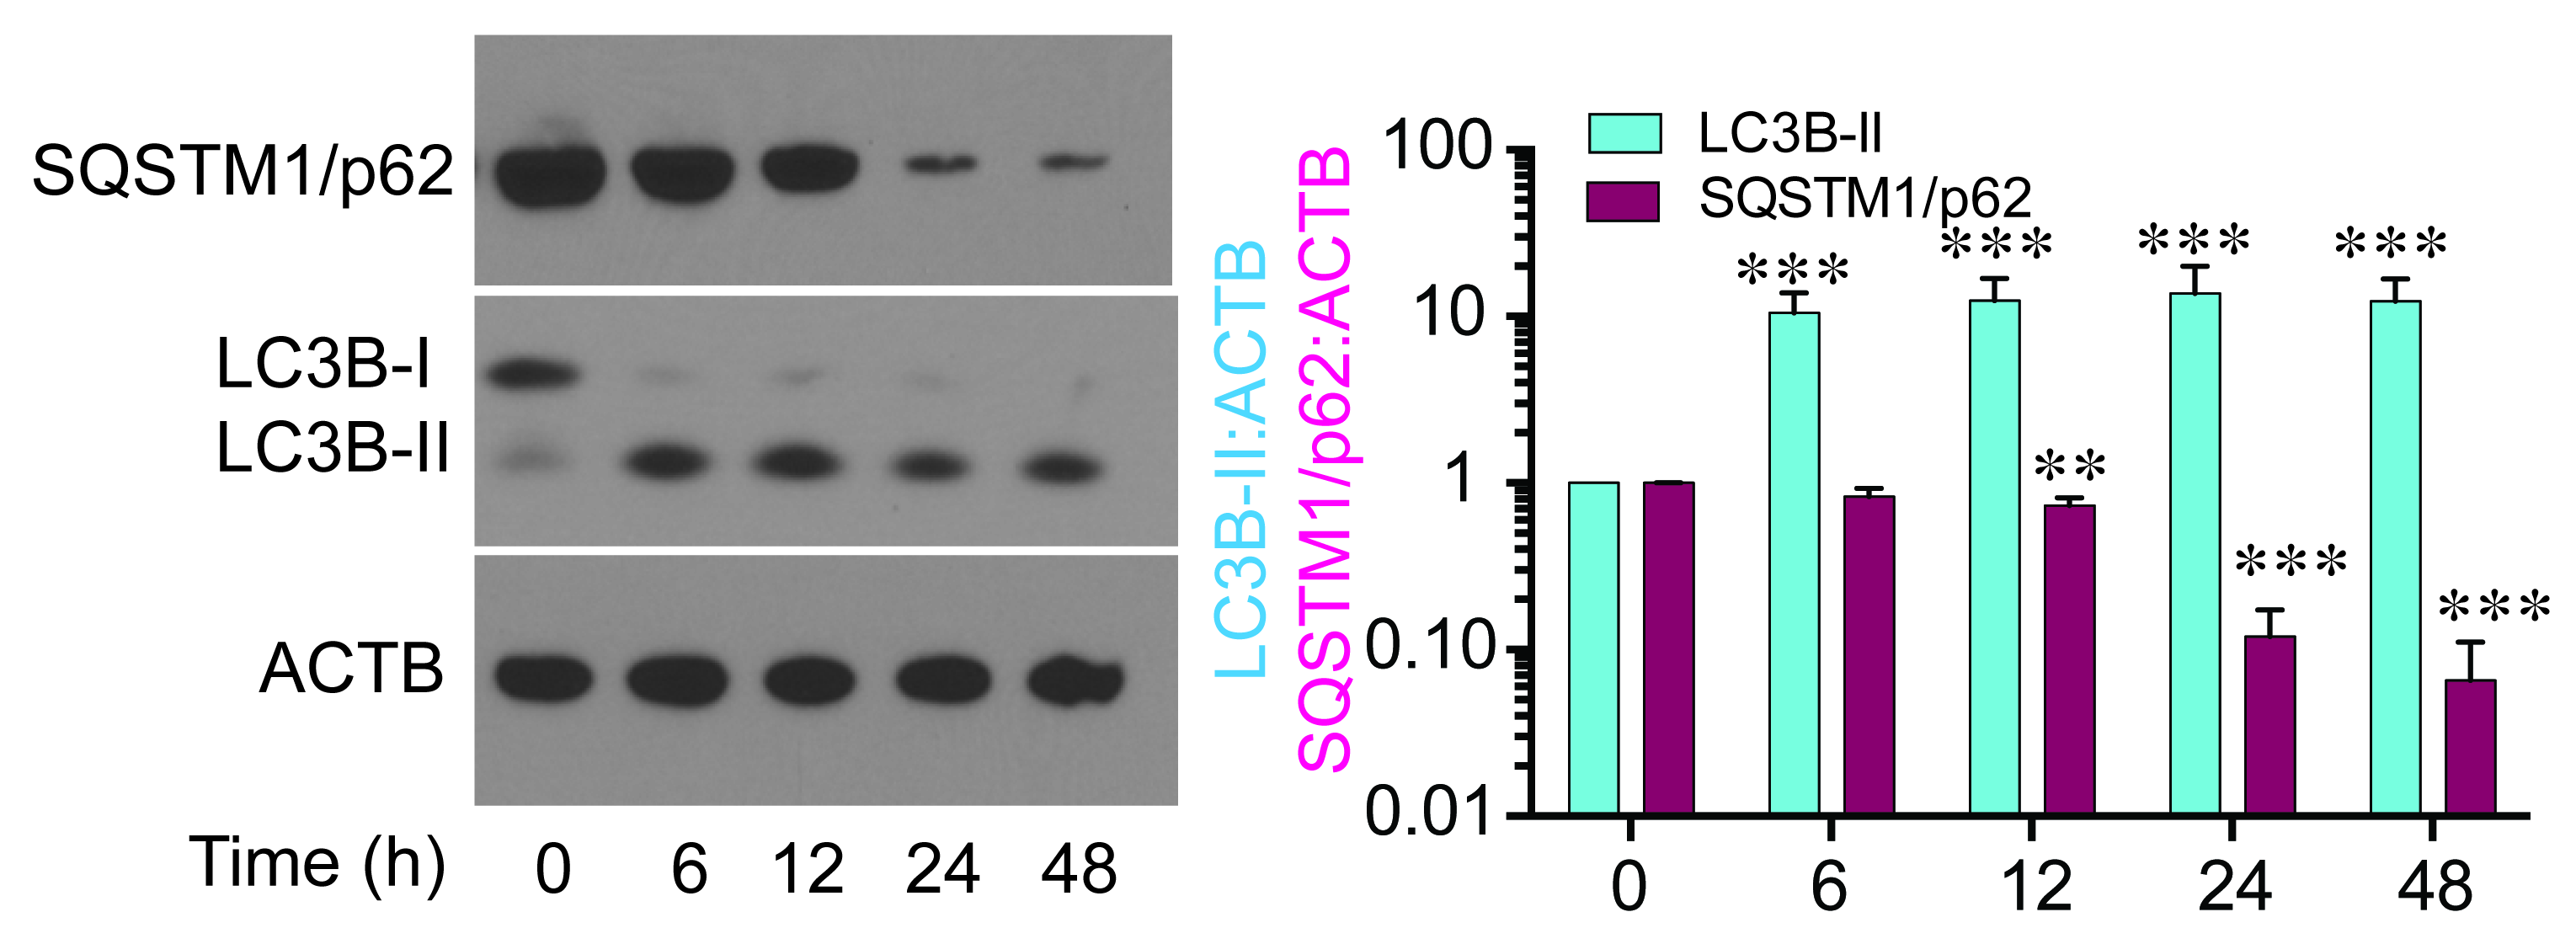
Figure S3.** NP-vFLIP-α2 induces persistent autophagy. Human macrophages were treated with 10 µM NP-vFLIP-α2 for 8 h. After adding fresh medium, macrophages were cultured for an additional 48 h. The collected cell lysates were tested for LC3B-II lipidation and SQSTM1/p62 degradation by western blot. A representative image is shown on the left. The densitometric quantifications are shown on the right. Data are derived from 4 different donors and shown as means ± s.e.m.*P*<0.01, *P*<0.001.

**
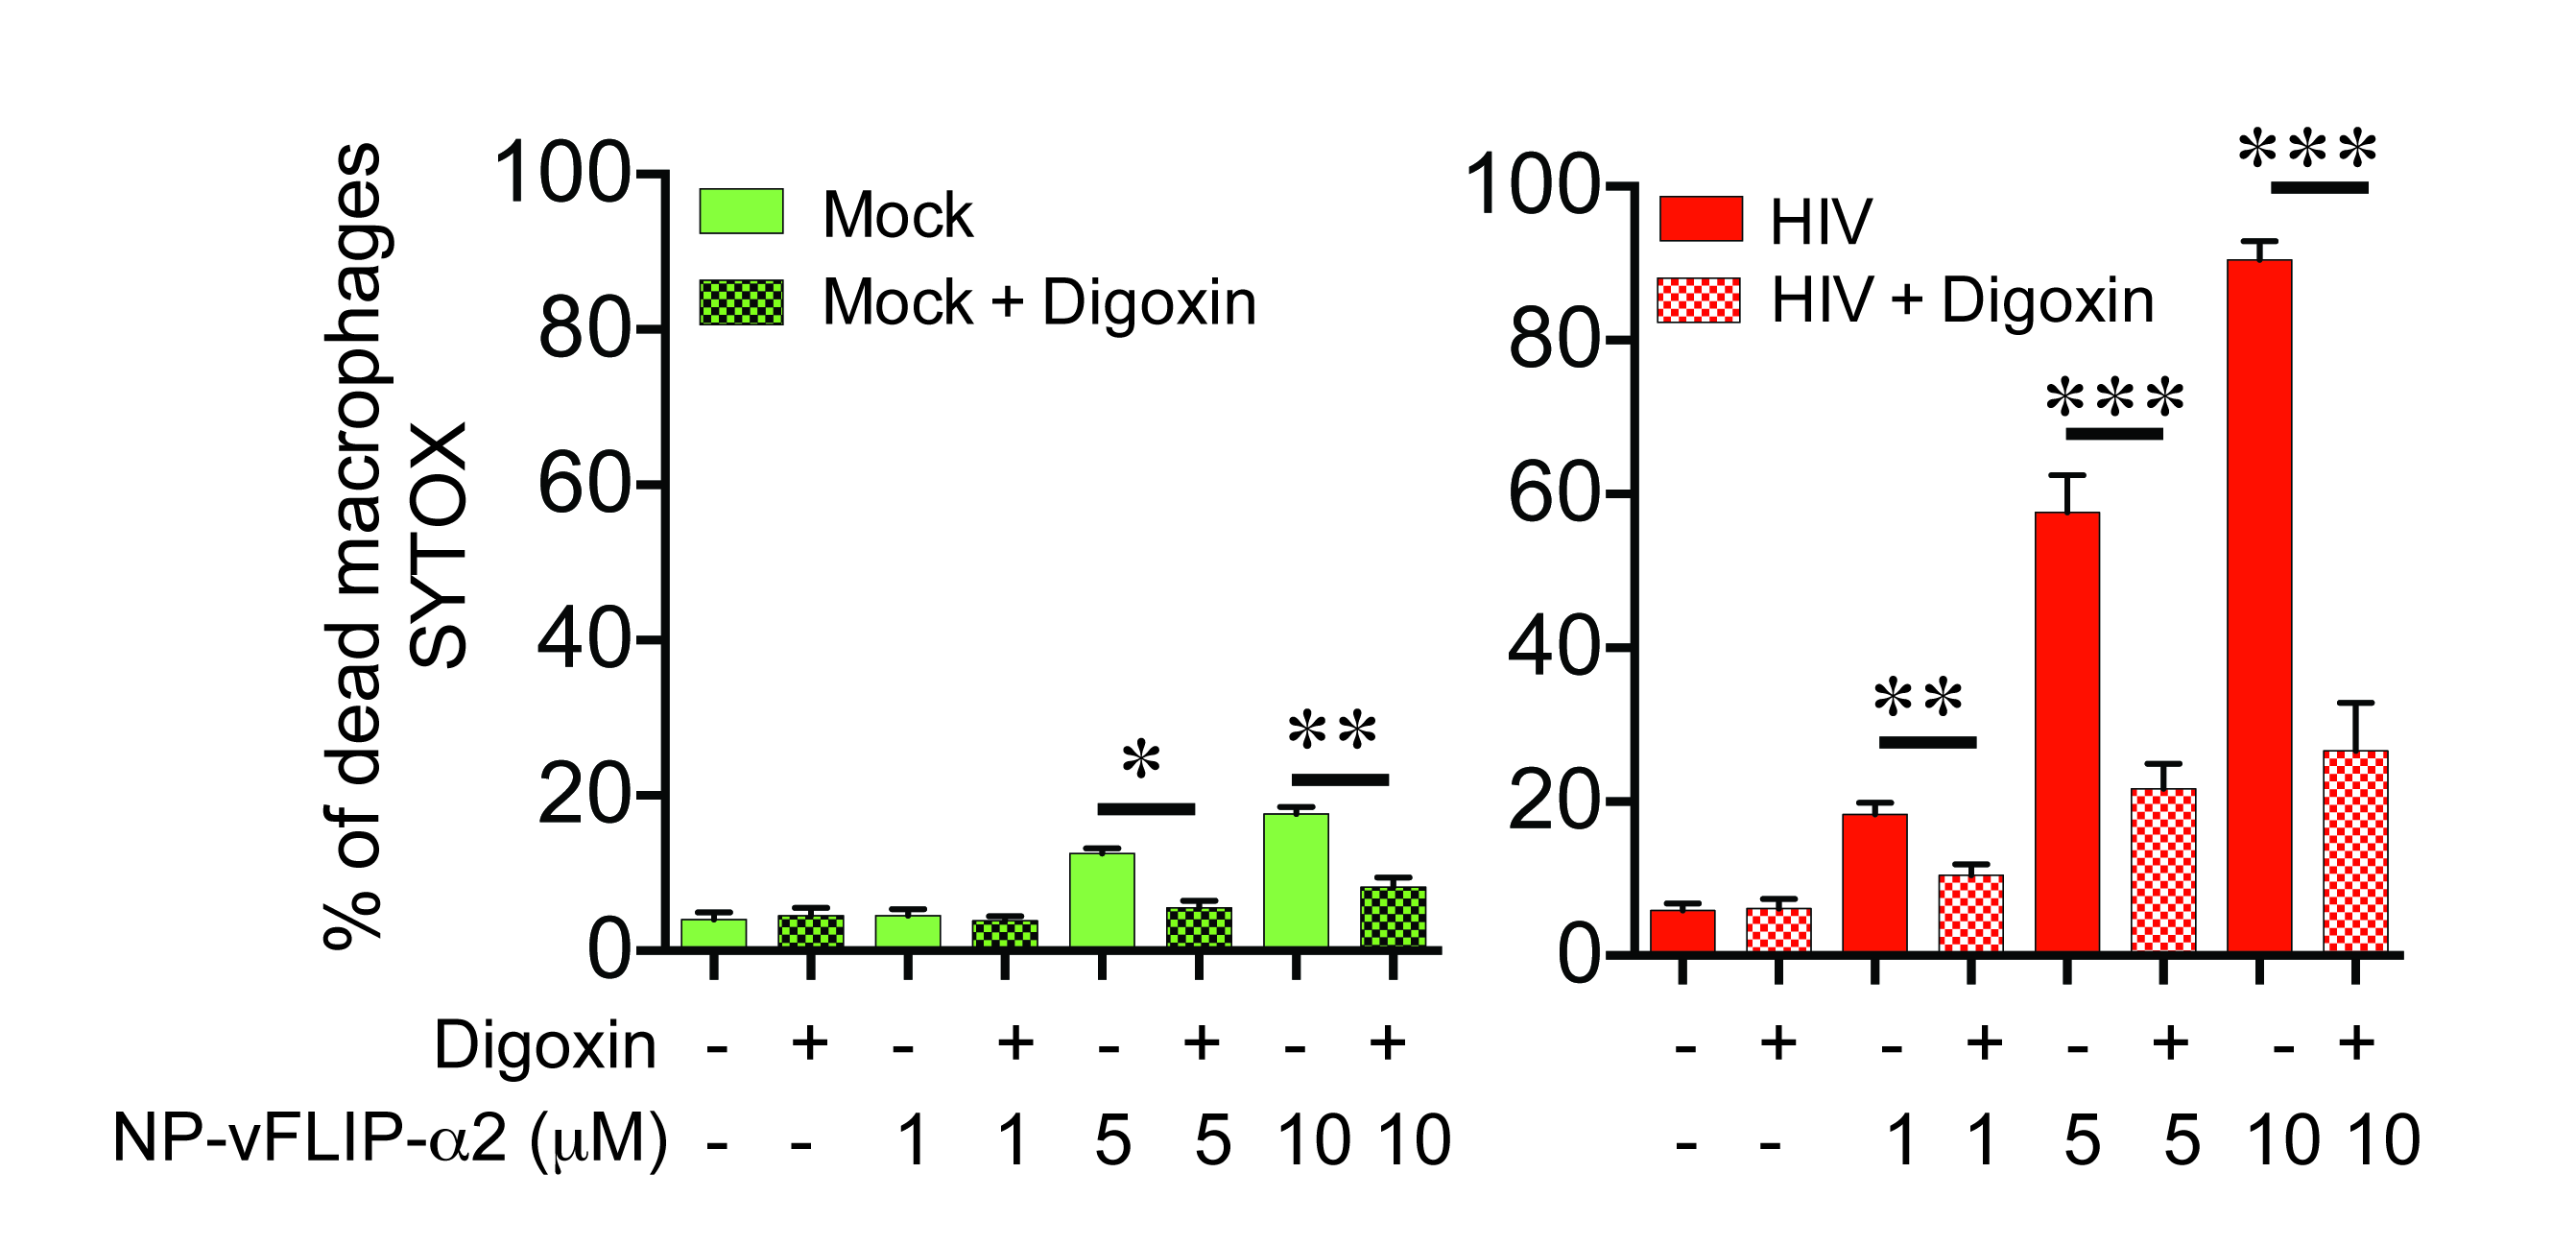
Figure S4.** Na+/K+-ATPase inhibitor digoxin blocks NP-vFLIP-α2 induced cell death in chronically infected macrophages. Chronically HIV-infected macrophages were incubated with 50 nM digoxin and a single dose of NP-vFLIP-α2. After 6 days post treatment, the percentage of dead macrophages was detected by SYTOX nuclear staining. Data are derived from 4 different donors and reported as means ± s.e.m *P*<0.05, *P*<0.01, *P*<0.001.


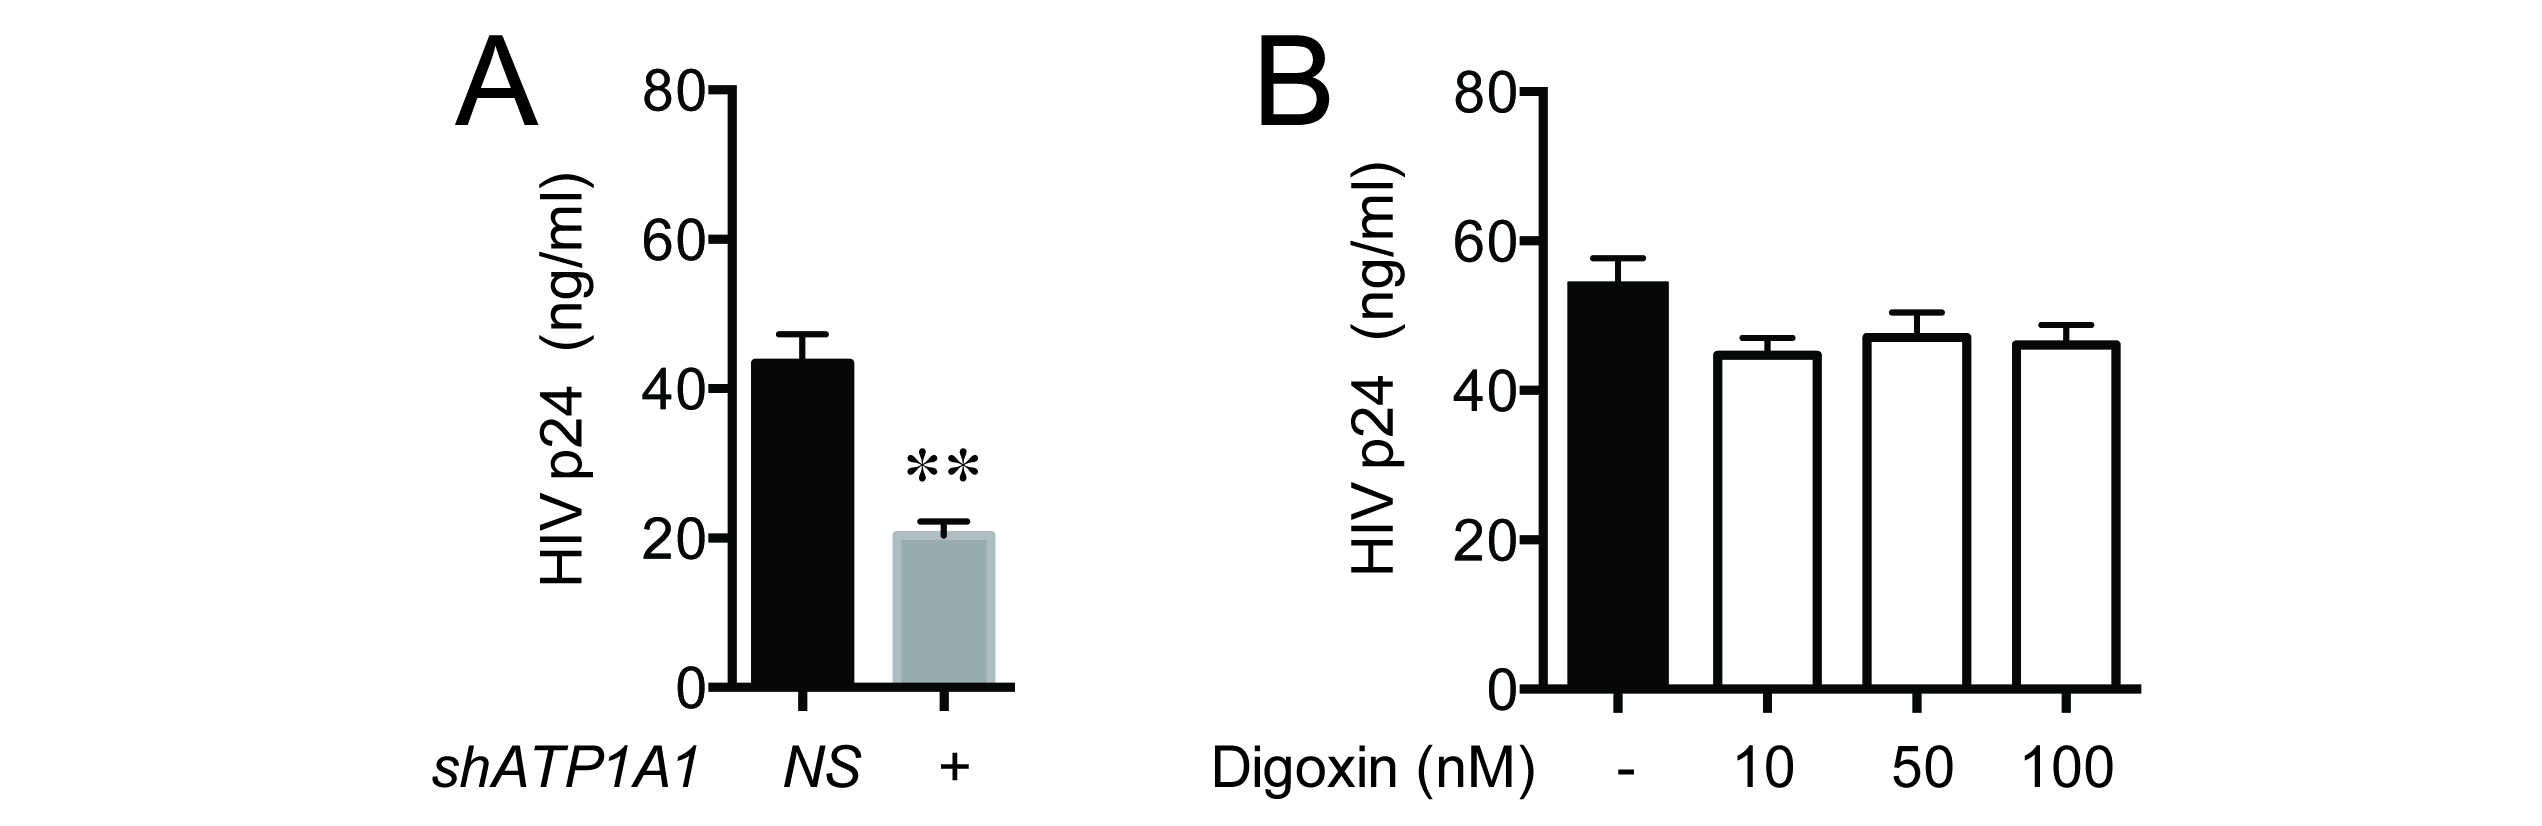


**Figure S5.** Downregulation of ATP1A1 decreases HIV replication in macrophages while digoxin has little effect on viral release.(**A**) At day 5 p.i., macrophages were transduced with sh*ATP1A1* and nonspecific shRNA. After 6 days, culture supernatants were tested for HIV p24 Ag. (**B**). Chronically HIV-infected macrophages were treated with digoxin for 96 h, and collected culture supernatants were analyzed for HIV p24 Ag. Data are derived from 4 different donors and reported as means ± s.e.m. *P*<0.01.

**
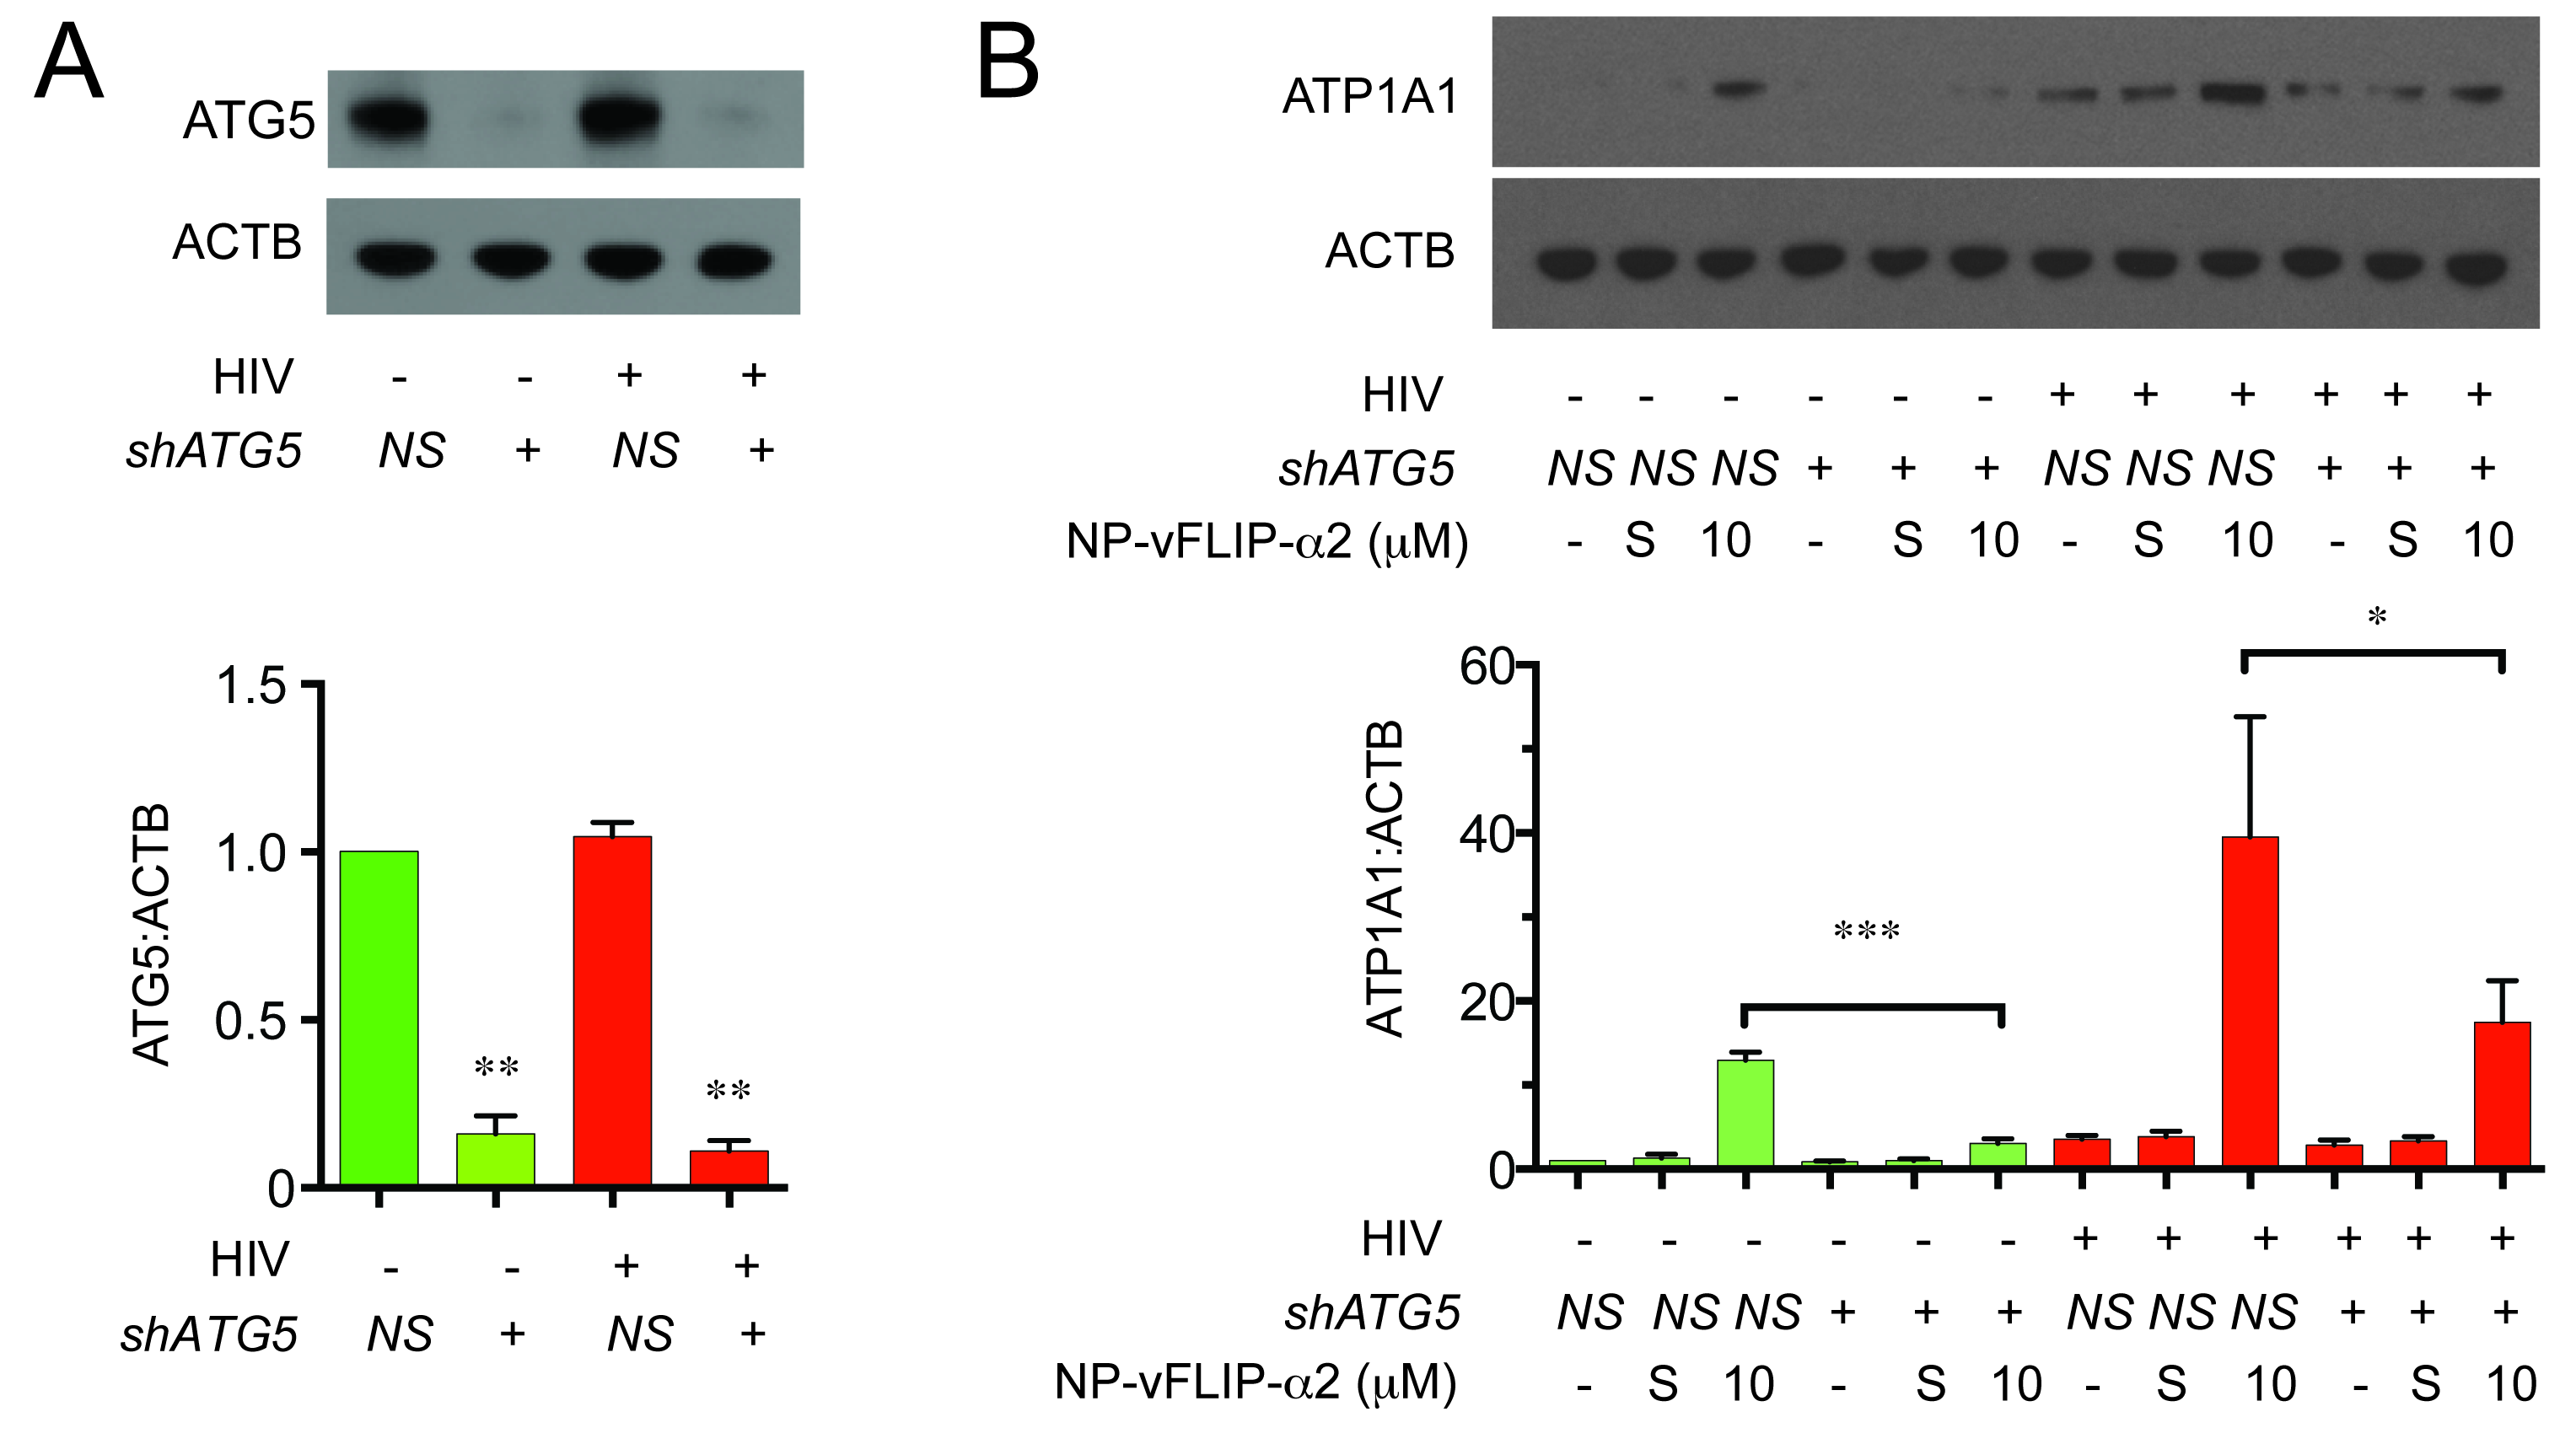
Figure S6.** Knockdown of *ATG5* decreases ATP1A1 expression in chronically infected macrophages.(**A**)Human macrophages were transduced with sh*ATG5* and nonspecific shRNA. The knockdown efficacy was monitored by western blot at day 6 post treatment. (**B**) Following treatment with shRNA, macrophages were infected with HIV to establish a chronic infection. At day 10 p.i., cells were treated with NP-vFLIP-α2 for 8 h and cultured for another 24 h with fresh medium. The harvested cell lysates were tested by western blot for ATP1A1. Densitometric analysis was performed on immunoblots and plotted based on 4 different donors that were normalized to ACTB and shown as means ± s.e.m.. S stands for 10 µM nanoformulated Tat-vFLIP-α2 scrambled peptides. *P*<0.05, *P*<0.01,*P*<0.001.

**
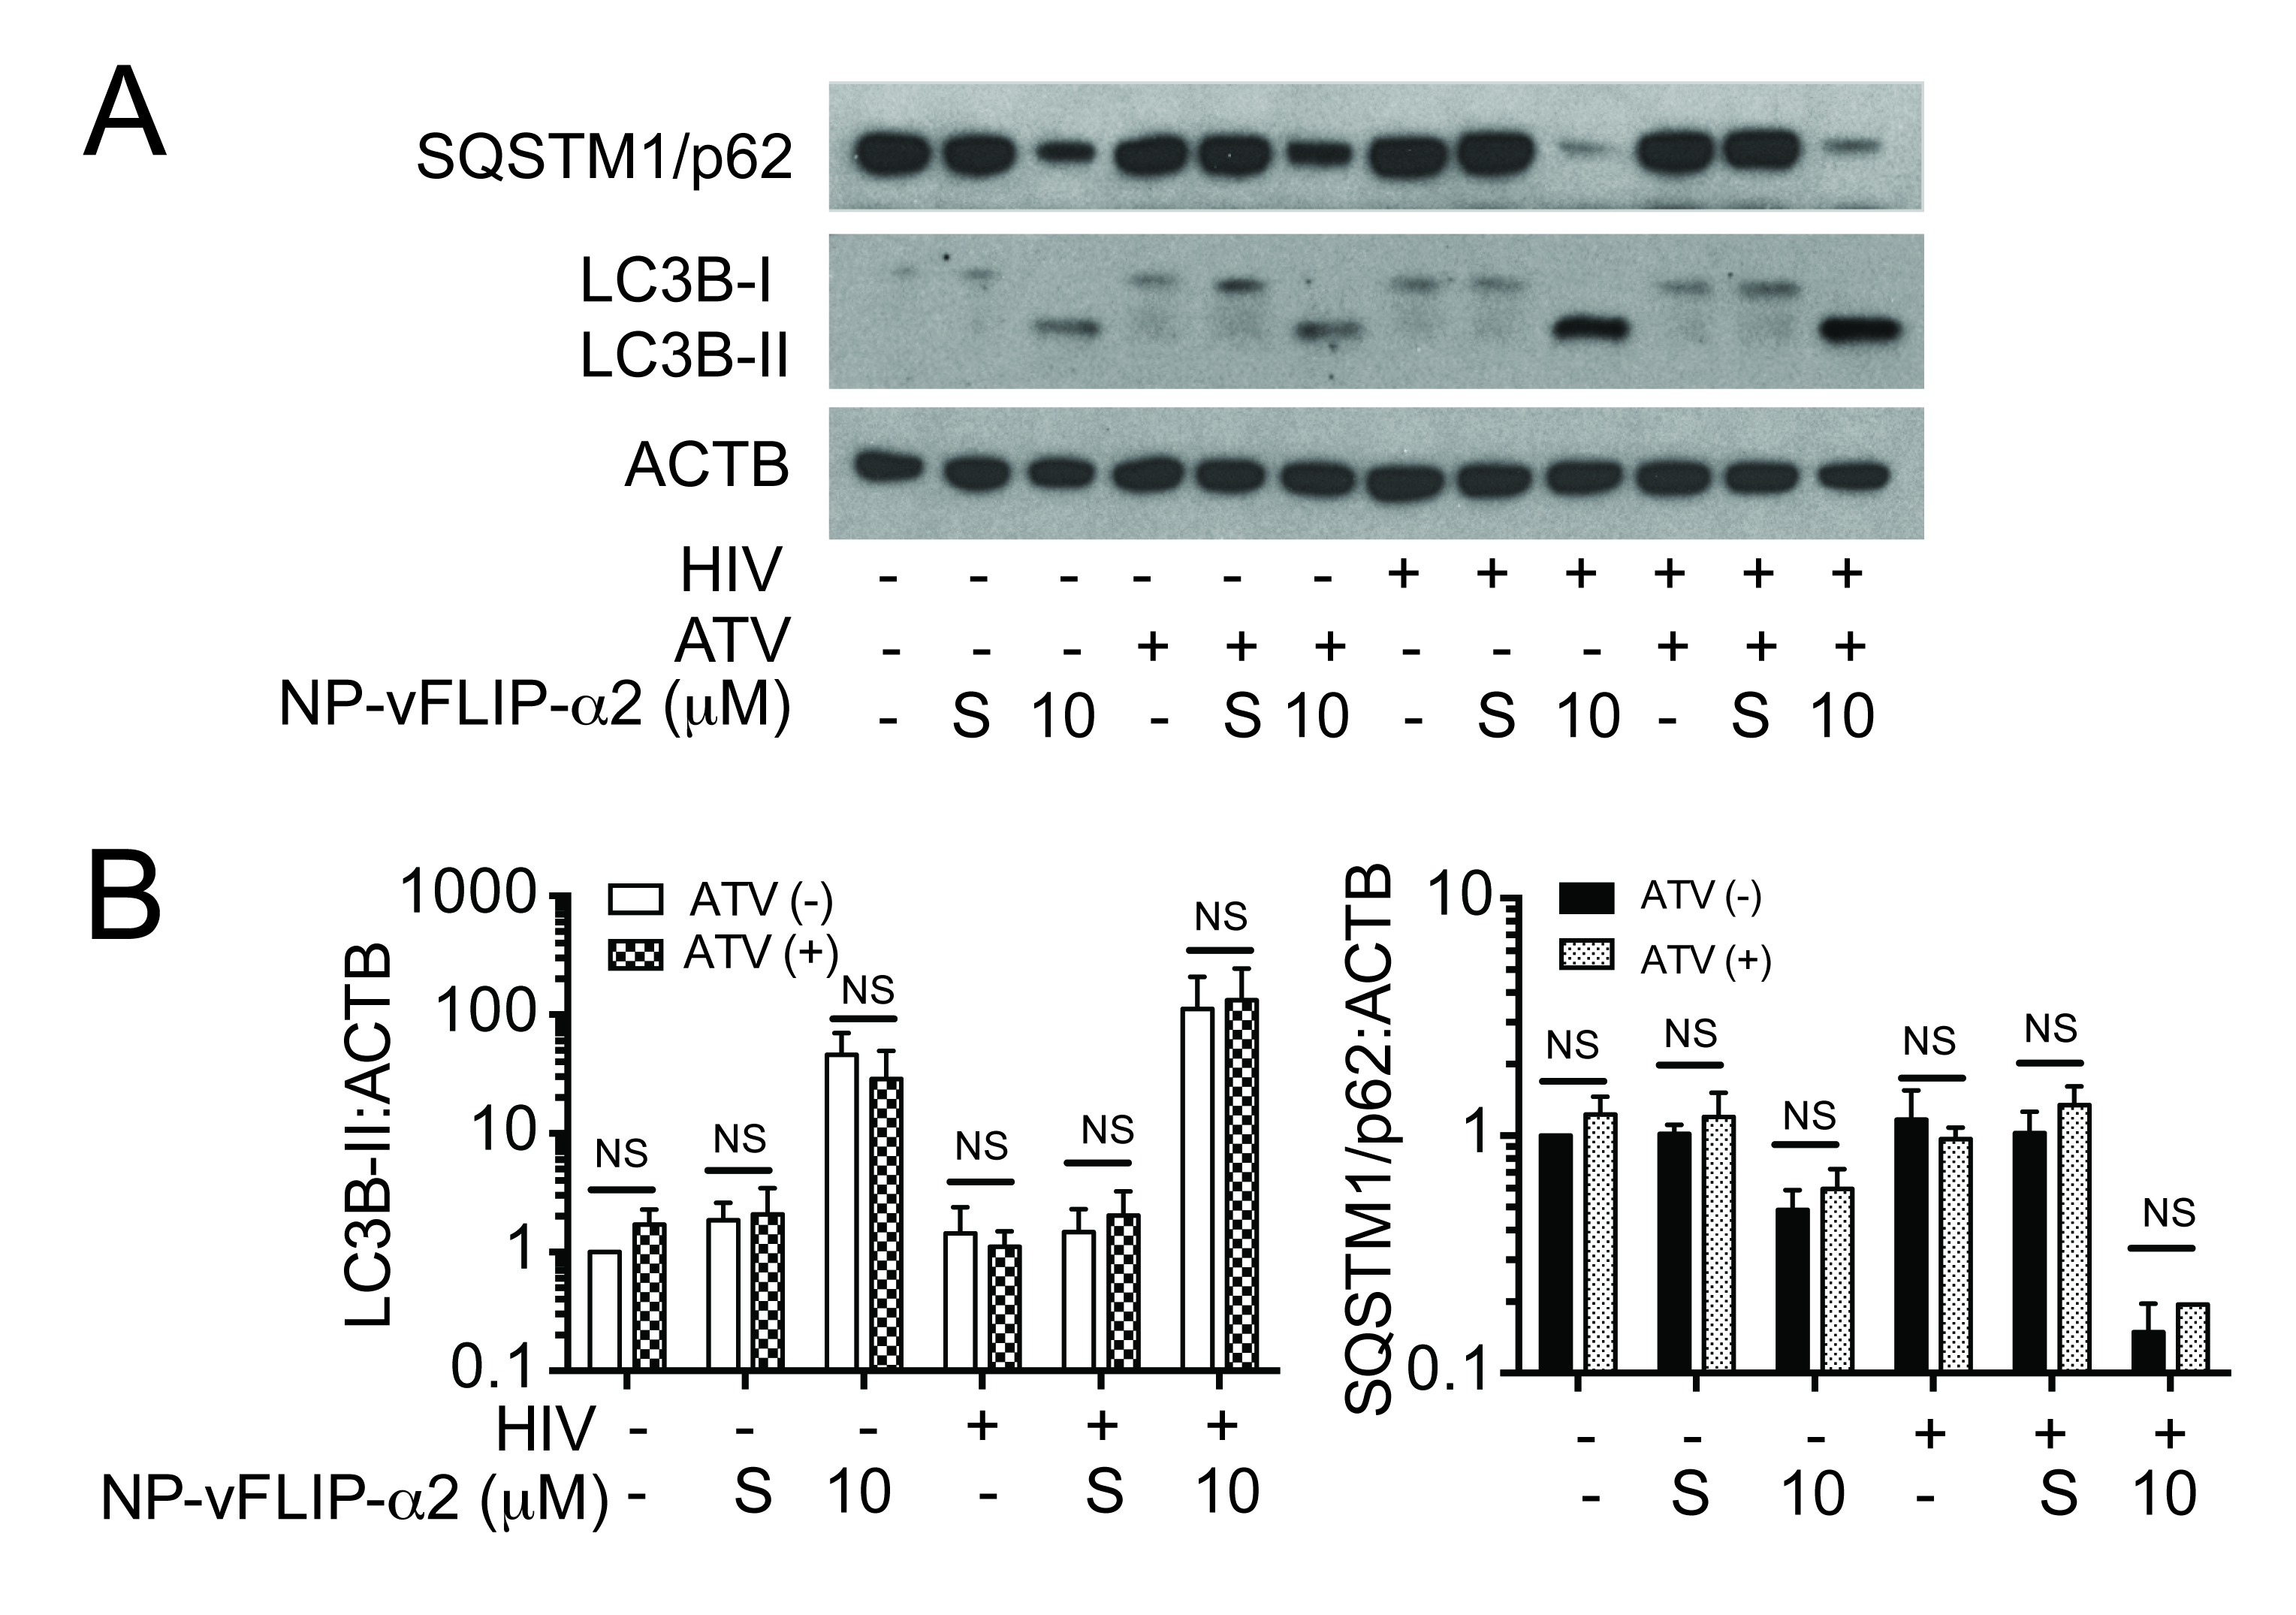
 Figure S7.** HIV protease inhibitor atazanavir has no effect on autophagy in chronically HIV-infected macrophages. (**A**) Chronically HIV-infected macrophages were treated with 500 nM atazanavir (ATV). After 2 days of treatment with atazanavir, macrophages were incubated with NP-vFLIP-2 for 8 hrs and cultured with 500 nM atazanavir for an additional 24 h. The harvested cells were analyzed by western blot for LC3B-II lipidation and SQSTM1/p62 degradation. (**B**) Densitometric quantifications are plotted based on 4 different donors following normalization to ACTB as means ± s.e.m.. S stands for 10 µM nanoformulated Tat-vFLIP-α2 scrambled peptides. NS stands for no significant difference.


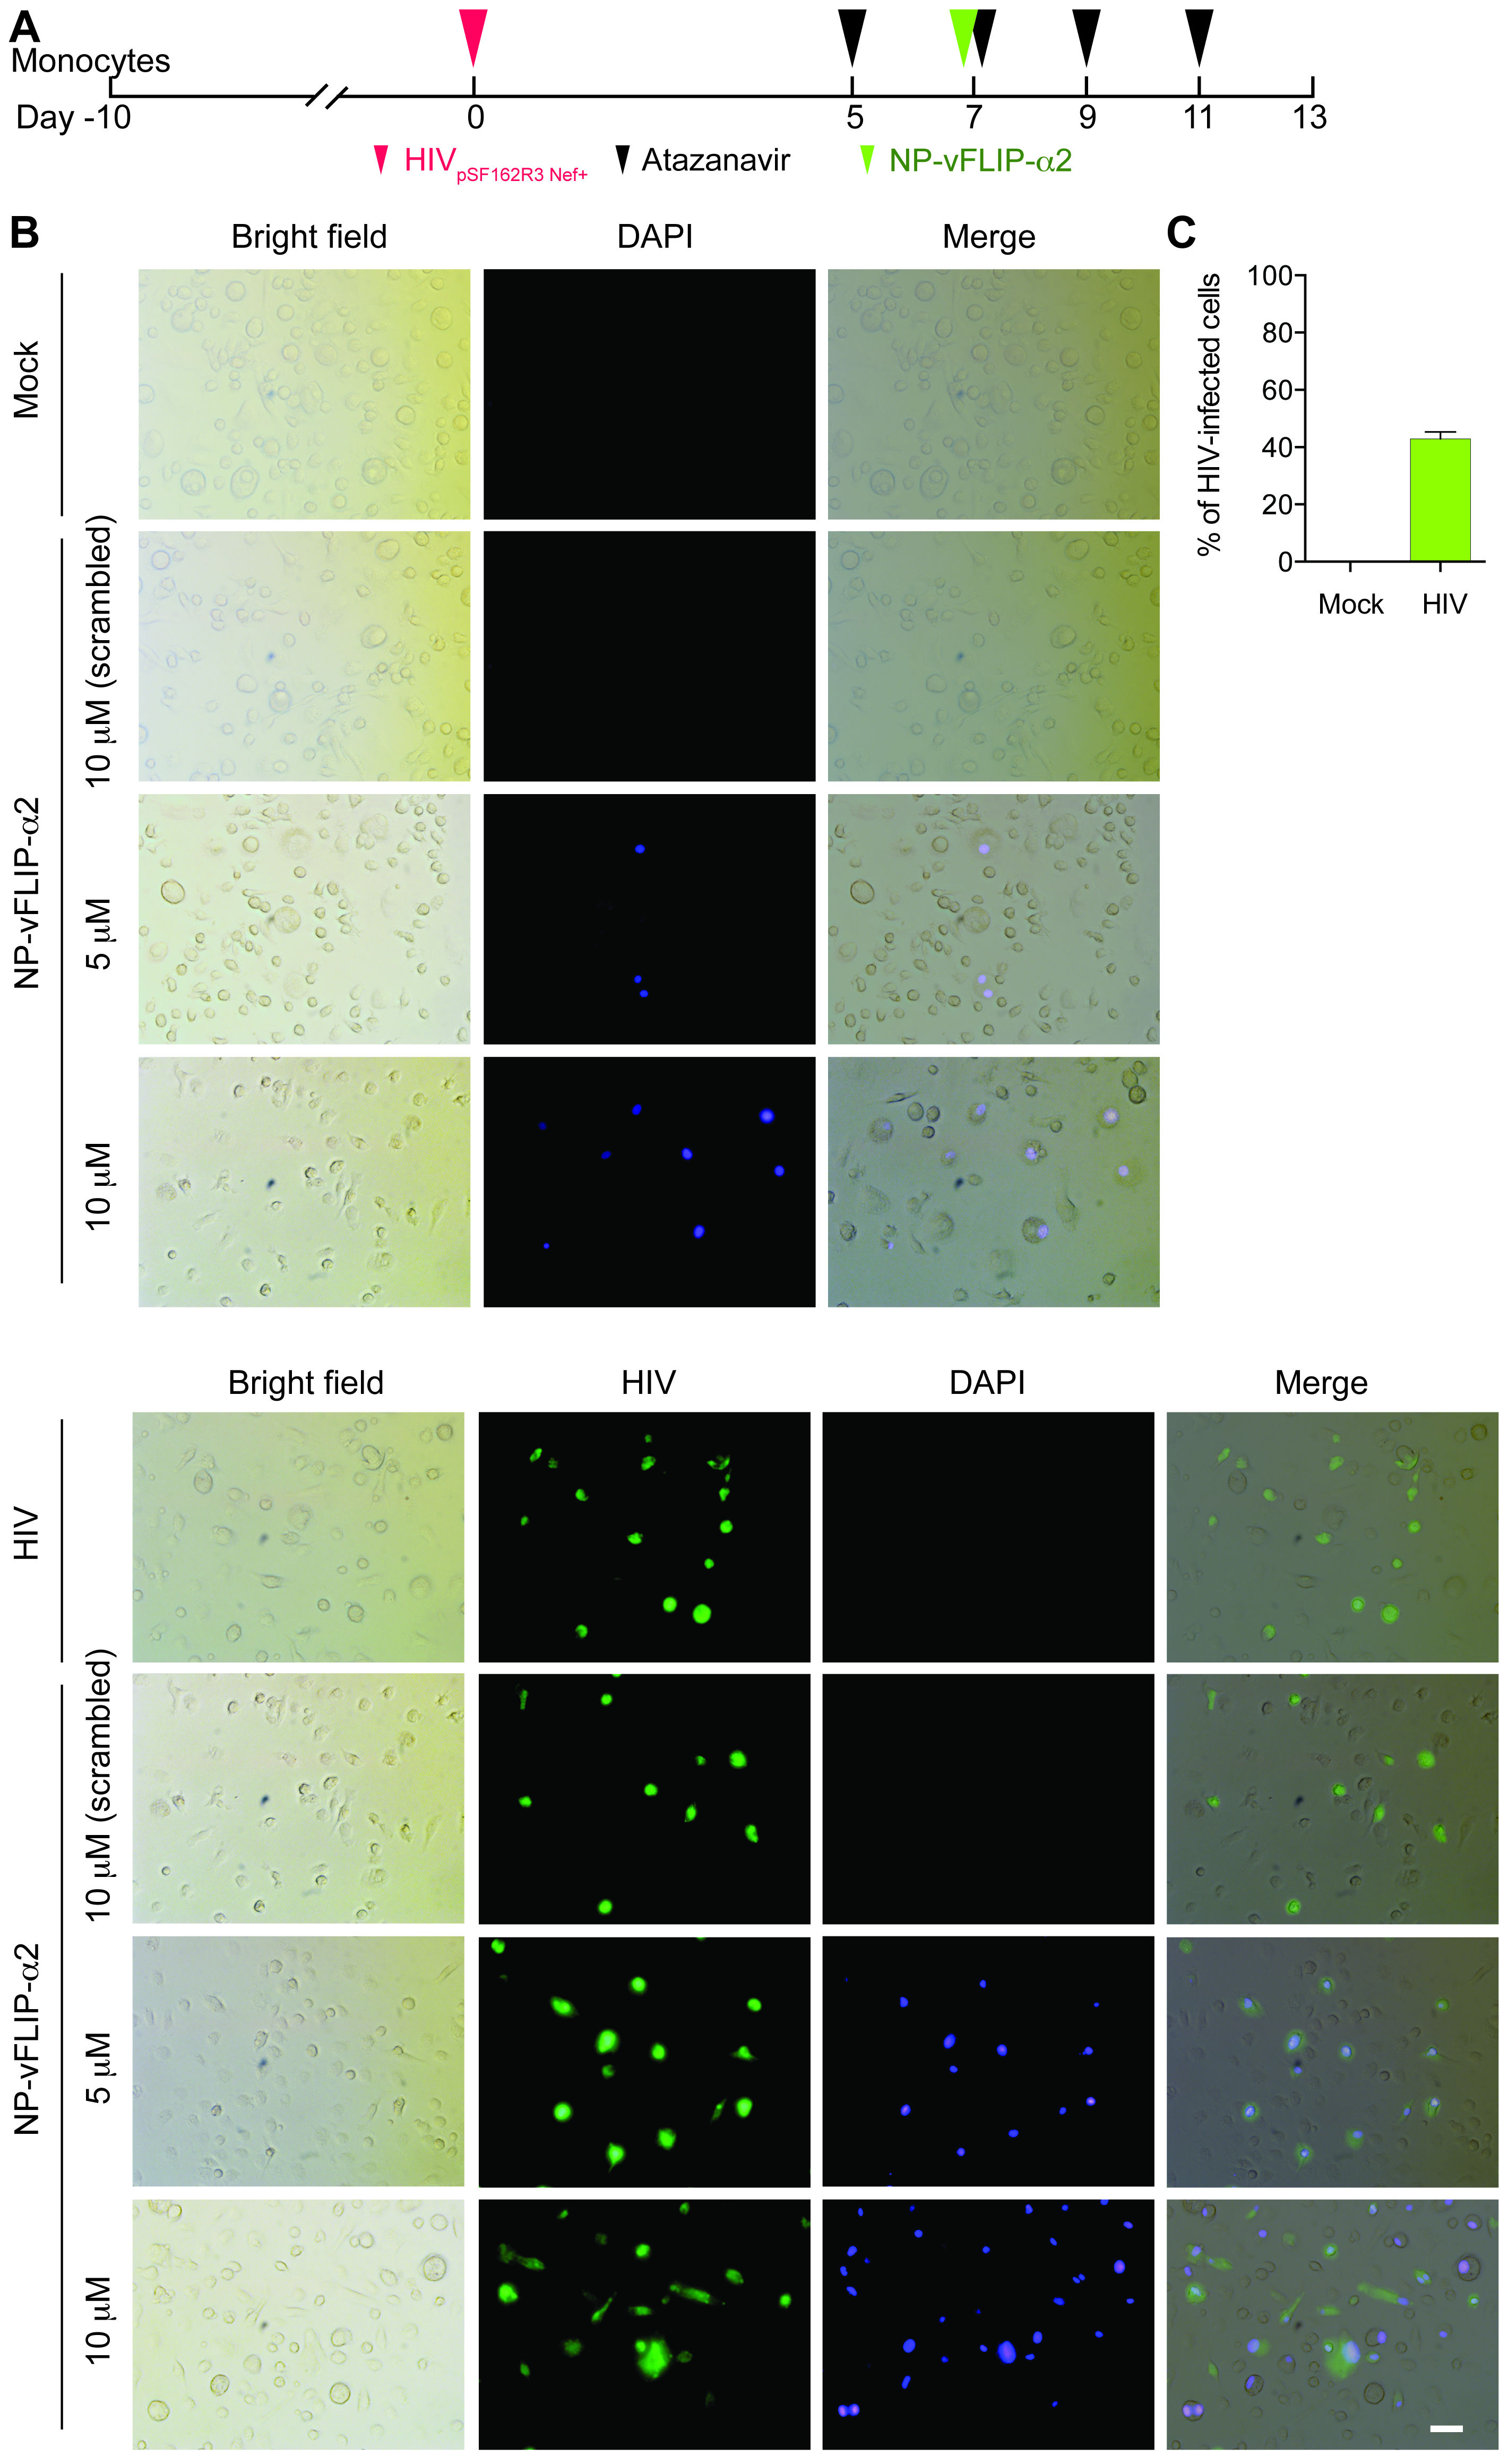


**Figure S8.** NP-vFLIP-α2 preferentially kills HIV-infected over bystander macrophages (representative imagines).(**A**) Macrophages were infected with HIV-GFP-pSF162R3Nef+ at MOI=0.1. At day 5 p.i., cells were incubated with the HIV protease inhibitor atazanavir 500 nM for 2 days. At day 7 p.i., cells were treated with NP-vFLIP-2 for 8 h, washed with PBS, and replenished with atazanavir 500 nM in culture media every other day. (**B**) At day 13 p.i., dead cells were stained with dsDNA dye DAPI which is impermanent to live cells. The live cell images were captured by fluorescence microscopy. The purple color represents dead cell nucleic acid staining. The green color represents GFP signaling from HIV-infected macrophages. Scale bar: 50 µm. (**C**) At day 13 p.i., the percentage of HIV-infected cells was quantified from live cell images. All quantifications are based on 4 different donors and presented as means ± s.e.m.


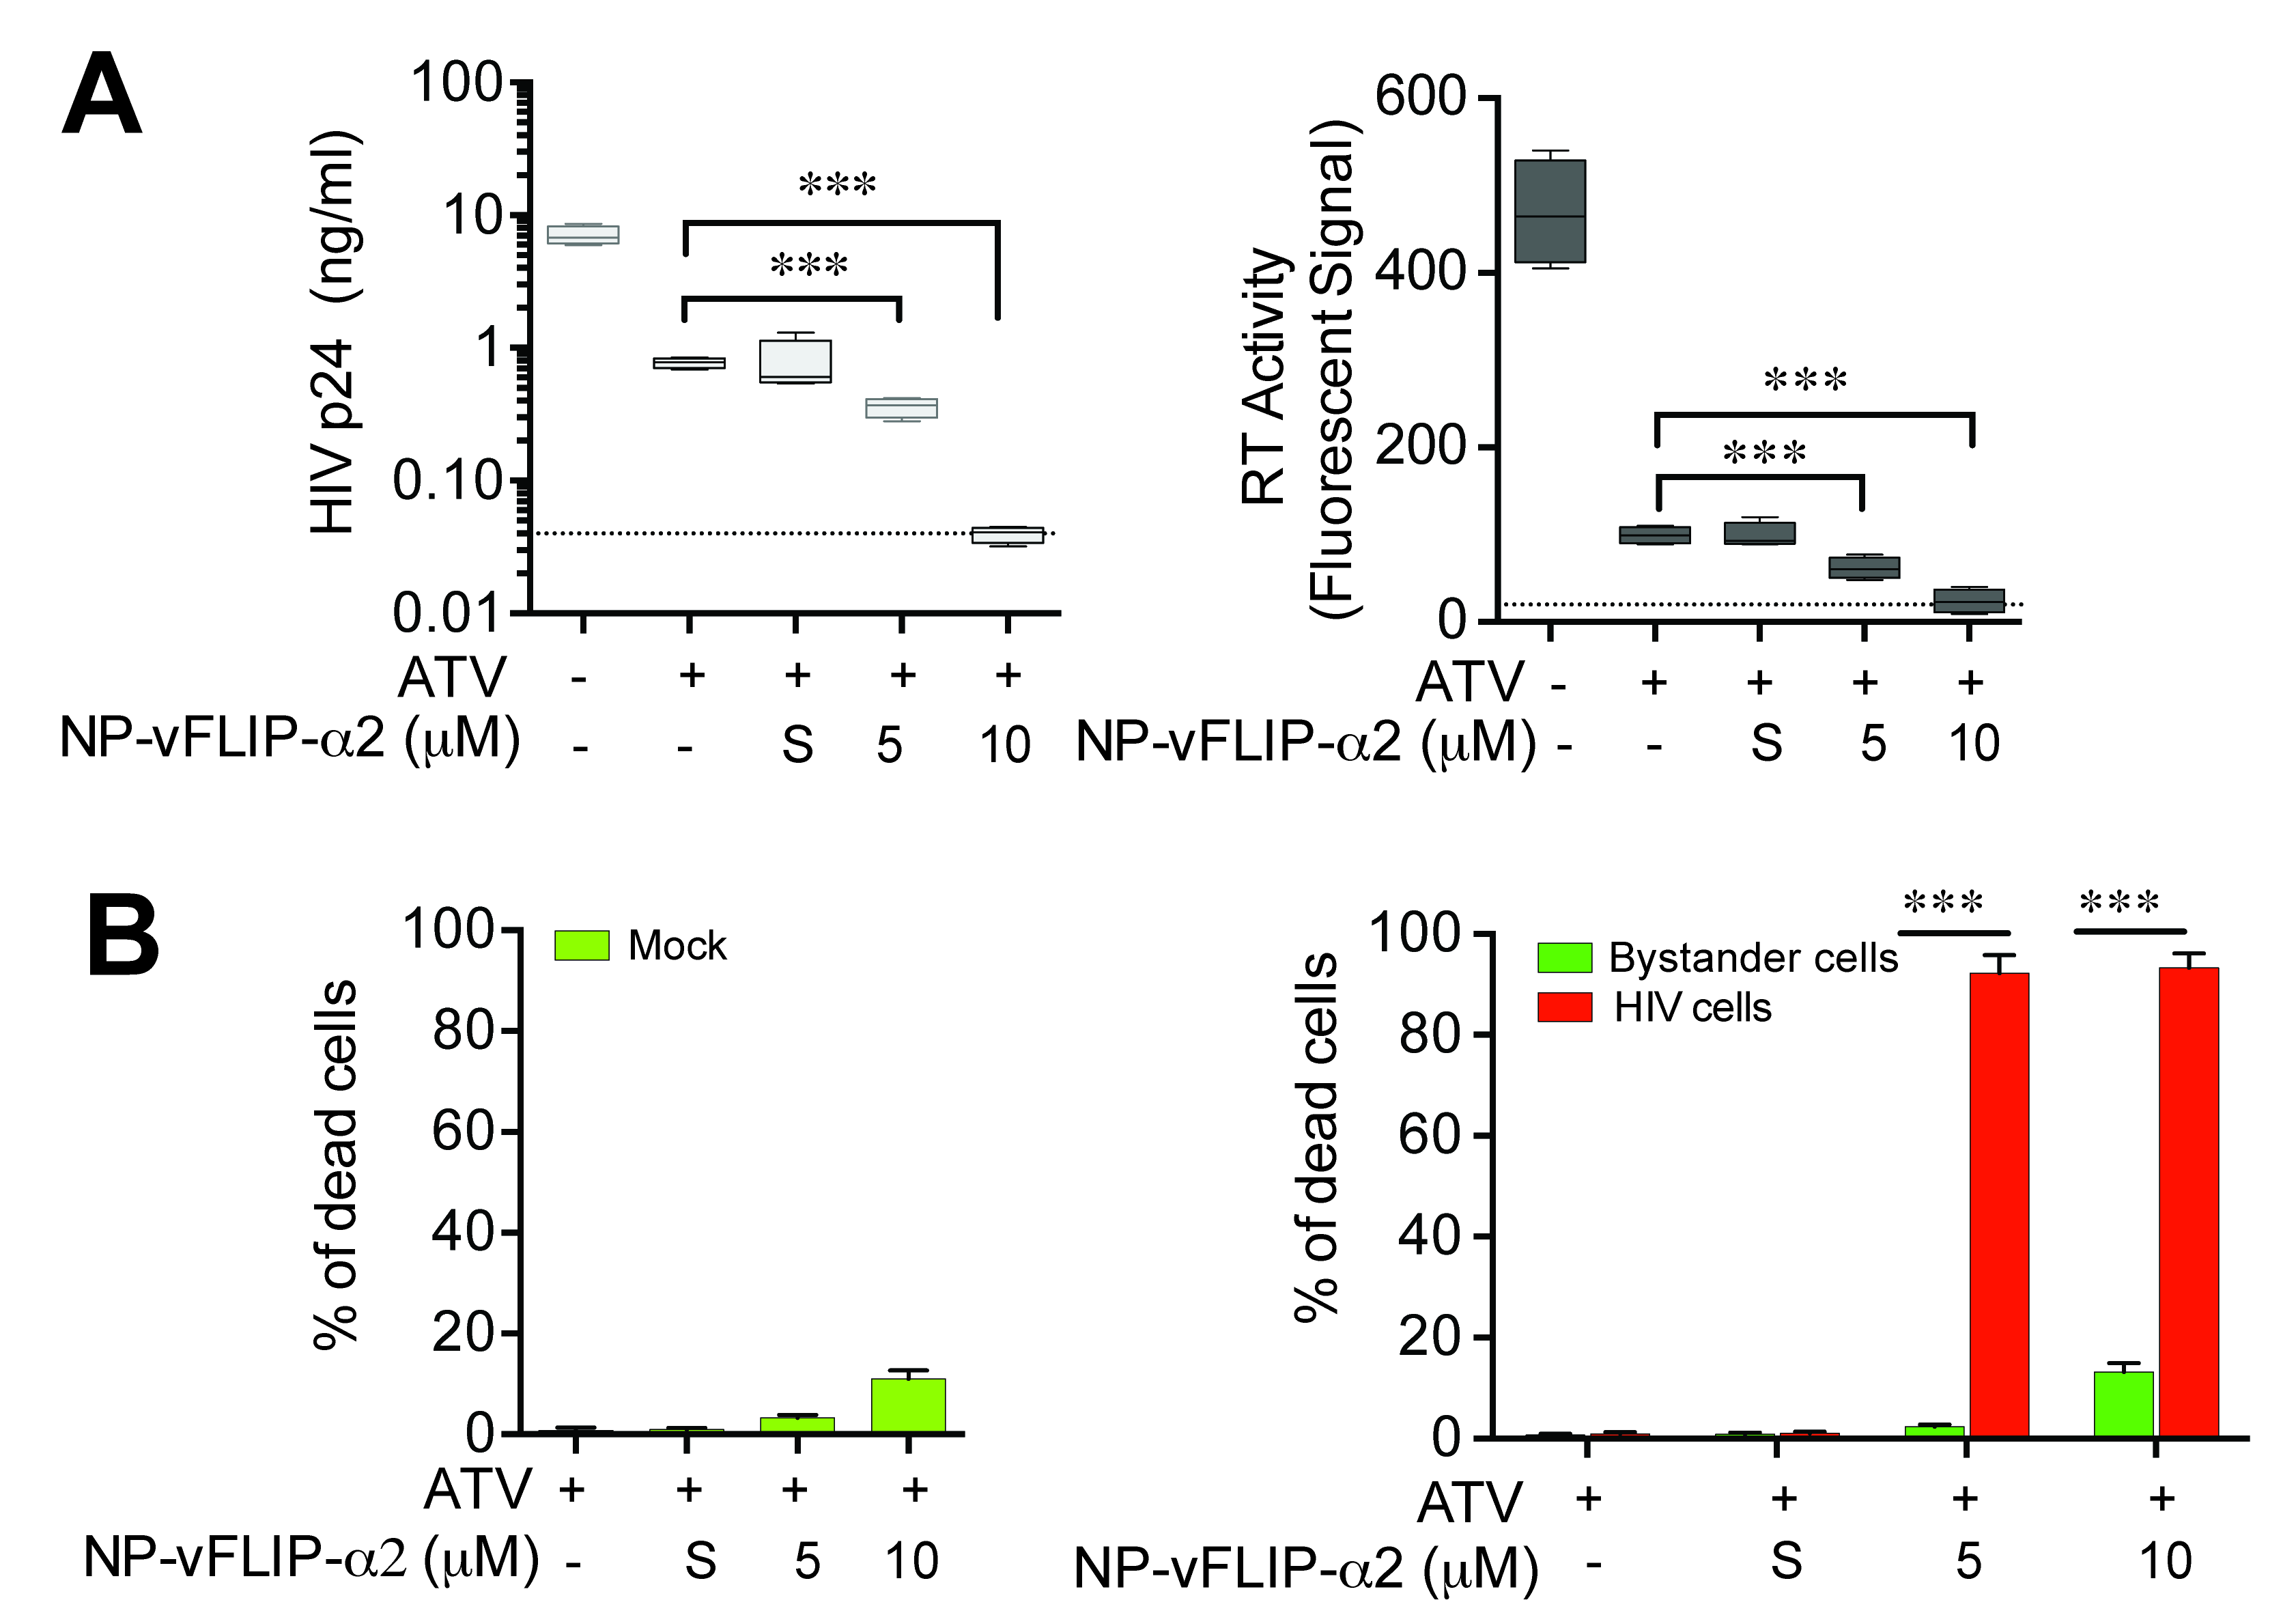
**Figure S9.** NP-vFLIP-α2 preferentially kills HIV-infected over bystander macrophages (continued from Figure S8).(**A**) At day 13 p.i., culture supernatants were collected and assayed for HIV p24 Ag and HIV RT activity. (**B**) Dead cells were analyzed with DAPI staining and for HIV GFP positivity. Data are derived from 4 different donors and reported as means ± s.e.m. *P*<0.001.
